# Supplementary material
Source: ML conference proceedings conference paper supplement (https://aclanthology.org/2022.findings-emnlp.75)
Supplement: note [file 2022.findings-emnlp.75.note.pdf]

Following meta reviewer's comments, we modified the structure of the paper, for enhanced clarity on methodology. We include more explanation in the methodology, and move related works after the introductions. We also denote our insufficient number of human evaluation in the Limitations section. Additionally, we include the Fleiss' kappa for the evaluators agreement and indicate there are no relations between annotators. We are still conducting human evaluations right now. Moreover, we will include more experimental results on another benchmark with strong baselines in future work to resubmit another ACL venue as reviewer suggested.
